# Supplementary material for: Survival Analysis by Penalized Regression and Matrix Factorization
Source: Hindawi journal article supplement (doi:10.1155/2013/632030), 2013-01-01
Supplement: f1 [file 632030.f1.pdf]

# Supplementary Information on “Survival Analysis by Penalized Regression and Matrix Factorization”

*Yeuntyng Lai, Morihiro Hayashida and Tatsuya Akutsu*

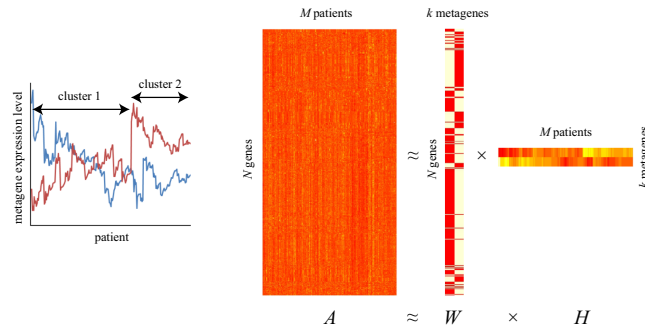

Figure S1: A rank-2 NMF example in microarray data (see also J.P. Brunet, P. Tamayo, T.R. Golub, and J.P. Mesirov, “Metagenes and molecular pattern discovery using matrix factorization,” *PNAS*, vol. 101, pp. 4164–4169, 2004.)

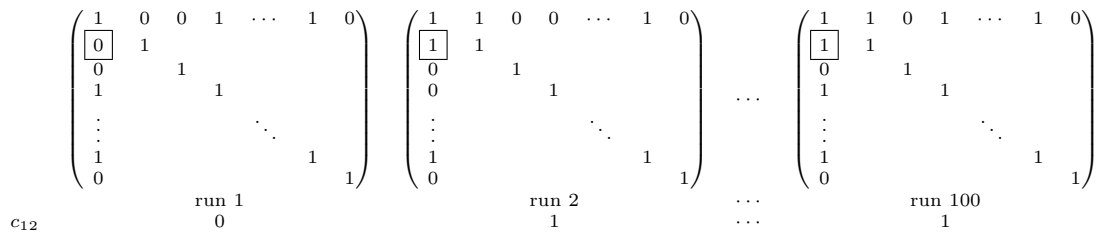

Figure S2: Connectivity matrix  $(c_{ij})$  over 100 runs.

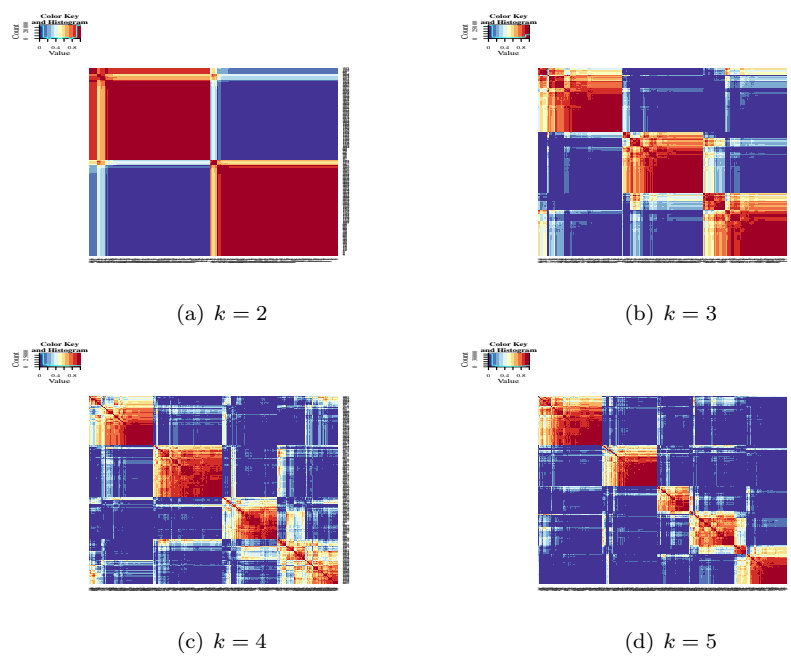

Figure S3: Consensus clustering results of 434 genes without missing values for rank  $k = 2, \dots, 5$ .

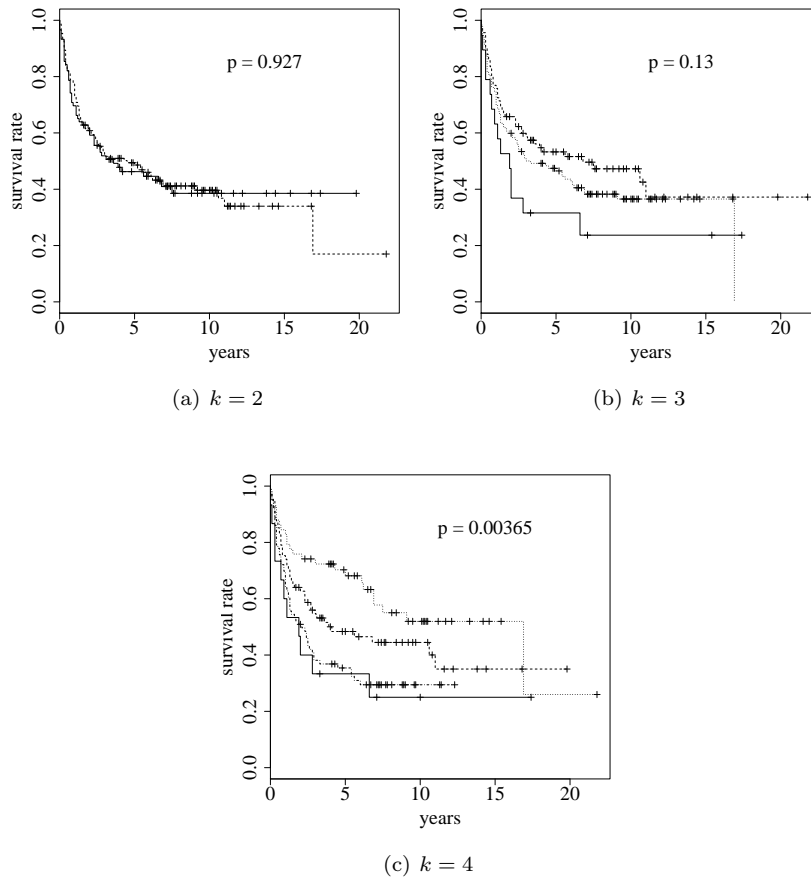

Figure S4: The Kaplan-Meier curve results of three kinds of patient division using 434 genes without missing values corresponding to rank  $k = 2, \dots, 4$ .
